# Supplementary material
Source: HighWire-hosted journal article supplement (https://bmjopen.bmj.com/content/7/6/e016844)
Supplement: inline-supplementary-material-1 [file inline-supplementary-material-1.pdf]

## Appendix – Medline Search strategy (adapted for use in Embase and CiNAHL)

| No | Search term                          |
|----|--------------------------------------|
| 1  | subclavian.ti,ab.                    |
| 2  | stenosis.ti,ab.                      |
| 3  | 1 and 2                              |
| 4  | inter-arm.ti,ab.                     |
| 5  | interarm.ti,ab.                      |
| 6  | 4 or 5                               |
| 7  | blood pressure*.ti.                  |
| 8  | differen*.ti.                        |
| 9  | 7 and 8                              |
| 10 | ABI.ti,ab.                           |
| 11 | ABPI.ti,ab.                          |
| 12 | ankle brachial pressure.ti,ab.       |
| 13 | ankle brachial pressure index.ti,ab. |
| 14 | 10 or 11 or 12 or 13                 |
| 15 | 3 or 6 or 9 or 14                    |
| 16 | exp Cohort Studies/                  |
| 17 | cohort.mp.                           |
| 18 | follow up.mp.                        |
| 19 | 16 or 17 or 18                       |
| 20 | 15 and 19                            |
